# Supplementary material for: Vasi di bronzo in area apula. Produzioni greche ed italiche di età arcaica e classica
Source: Royal Society of Chemistry journal article supplement (doi:10.1039/c7nr08571k), 1996-01-01
Supplement: c7nr08571k1.pdf [file c7nr08571k1.pdf]

# ***In situ* tailoring of superconducting junctions via electro-annealing**

## **Supplementary Materials**

J. Lombardo,<sup>1</sup> Ž. L. Jelić,<sup>1,2</sup> X. D. A. Baumans,<sup>1</sup> J. E. Scheerder,<sup>3</sup> Jorge P. Nacenta,<sup>4</sup> V. V. Moshchalkov,<sup>3</sup> J. Van de Vondel,<sup>3</sup> M. V. Milošević,<sup>2</sup> R. B. G. Kramer,<sup>4</sup> and A. V. Silhanek<sup>1</sup>

<sup>1</sup>*Experimental Physics of Nanostructured Materials, Q-MAT, CESAM, Université de Liège, B-4000 Sart Tilman, Belgium*

<sup>2</sup>*Departement Fysica, Universiteit Antwerpen, Groenenborgerlaan 171, B-2020 Antwerp, Belgium*

<sup>3</sup>*Laboratory of Solid-State Physics and Magnetism, KU Leuven, Celestijnenlaan 200 D, box2414, BE-3001 Leuven, Belgium*

<sup>4</sup>*Université Grenoble Alpes, CNRS, Grenoble INP, Institut Néel, 38000 Grenoble, France*

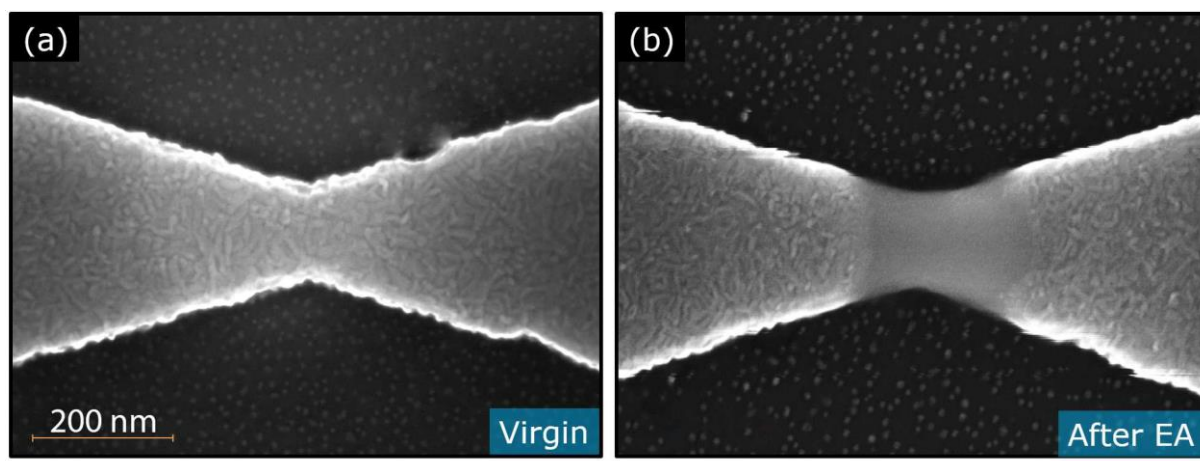

Figure S1 : **Details of amorphization by electro-annealing.** (a) High-resolution SEM image of the constriction in the virgin state. (b) Constriction after several electro-annealing processes. One notices a structural change in the constriction: the initially granular structure underwent amorphization.

Figure S1 shows high resolution scanning electron microscopy images of a Nb nanoconstriction before (Fig. S1(a)) and after several electro-annealing processes (Fig. S1(b)). In Fig. S1(a), the polycrystalline structure of the virgin Nb nanoconstrictions is clearly visible. Under electro-annealing, this polycrystalline structure vanishes locally and leaves place for an amorphized central area responsible for the formation of a weak link.

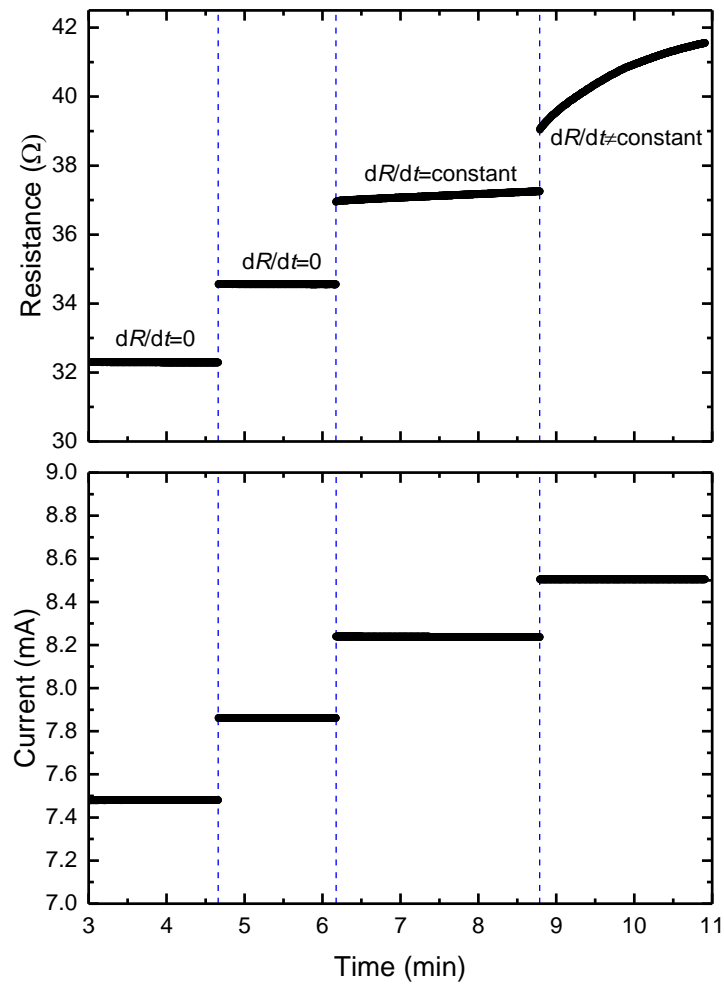

Figure S2 : **Time dependence of electro-annealing process.** Resistance as a function of time (upper panel) for the corresponding current (lower panel). The measurements have been performed at 10 K.

Figure S2 shows the time dependence of the electro-annealing process. The lower panel shows steps of constant current. The upper panel shows that even if the current remains constant, the electro-annealing process evolves in time for currents above certain threshold current. This points out to the importance of properly defining the electro-annealing current.
